# Supplementary material for: Work Satisfaction in the Food Industry—A Premise for Economic Performance
Source: MDPI journal article supplement (doi:10.3390/agriculture12071015), 2022-07-13
Supplement: s1 [file s1]

**Supplementary Materials. Prioritisation of employee motivations according to analysed characteristics.**

**Table S1.** Prioritization of employee motivations in accordance with development region (1-7 points scale).

| Motivations                      | Development Region |     |
|----------------------------------|--------------------|-----|
|                                  | NE                 | SE  |
| Friendliness of co-workers       | 3.3                | 2.7 |
| Relations with supervisor        | 4.6                | 4.2 |
| Ability/Efficiency of management | 3.0                | 3.1 |
| Promotion prospects              | 3.6                | 3.5 |
| Training provided                | 2.3                | 2.4 |
| Opportunity to show initiative   | 2.8                | 2.9 |
| Use of abilities                 | 1.2                | 1.1 |
| Variety of work                  | 1.9                | 1.9 |
| Hours worked                     | 4.7                | 4.8 |
| Amount of work                   | 4.6                | 5.1 |
| Work itself                      | 3.2                | 3.1 |
| Job security                     | 4.5                | 3.7 |
| Total pay                        | 5.2                | 5.4 |
| Fringe benefits                  | 4.4                | 5.0 |

**Table S2.** Gender-based prioritization of employee motivations (1-7 points scale).

| Motivations                      | Gender |      |
|----------------------------------|--------|------|
|                                  | Women  | Male |
| Friendliness of co-workers       | 3.7    | 2.3  |
| Relations with supervisor        | 5.1    | 3.6  |
| Ability/Efficiency of management | 2.8    | 3.2  |
| Promotion prospects              | 3.3    | 3.7  |
| Training provided                | 2.5    | 2.2  |
| Opportunity to show initiative   | 2.4    | 3.2  |
| Use of abilities                 | 1.3    | 1.1  |
| Variety of work                  | 2.1    | 1.8  |
| Hours worked                     | 5.1    | 4.5  |
| Workload                         | 5.1    | 4.6  |
| Work itself                      | 3.3    | 3.1  |
| Security of job                  | 4.3    | 3.9  |
| Total pay                        | 5.5    | 5.1  |
| Fringe benefits                  | 4.9    | 4.5  |

**Table S3.** Prioritization of employee motivations based on qualification level (1-7 points scale).

| Motivations                      | Employee Qualification Level |                  |                  |
|----------------------------------|------------------------------|------------------|------------------|
|                                  | Unqualified                  | Medium Qualified | Highly Qualified |
| Friendliness of co-workers       | 3.4                          | 2.4              | 3.2              |
| Relations with supervisor        | 4.7                          | 4.4              | 4.1              |
| Ability/Efficiency of management | 1.7                          | 3.4              | 4.0              |
| Promotion prospects              | 1.8                          | 3.8              | 5.0              |
| Training provided                | 0.9                          | 2.0              | 4.2              |
| Opportunity to show initiative   | 1.7                          | 2.8              | 4.0              |
| Use of abilities                 | 0.8                          | 1.2              | 1.5              |
| Variety of work                  | 0.8                          | 1.8              | 3.1              |
| Hours worked                     | 6.4                          | 4.4              | 3.6              |
| Workload                         | 5.8                          | 5.2              | 3.7              |
| Work itself                      | 2.7                          | 3.8              | 3.1              |
| Security of job                  | 4.9                          | 4.7              | 2.8              |
| Total pay                        | 6.0                          | 5.6              | 4.4              |
| Fringe benefits                  | 5.7                          | 4.8              | 3.7              |

**Table S4.** Prioritization of employee motivations based on work experience (1-7 points scale).

| Motivations                      | Work Experience (years) |       |       |       |         |
|----------------------------------|-------------------------|-------|-------|-------|---------|
|                                  | 0-10                    | 10-20 | 20-30 | 30-40 | over 40 |
| Friendliness of co-workers       | 3.5                     | 3.2   | 2.7   | 2.3   | 3.4     |
| Relations with supervisor        | 5.2                     | 4.1   | 4.2   | 4.4   | 4.0     |
| Ability/Efficiency of management | 3.3                     | 2.9   | 2.8   | 2.8   | 3.1     |
| Promotion prospects              | 5.6                     | 5.3   | 3.0   | 1.8   | 1.7     |
| Training provided                | 3.2                     | 2.6   | 2.3   | 2.2   | 1.1     |
| Opportunity to show initiative   | 4.1                     | 3.8   | 2.6   | 1.8   | 1.6     |
| Use of abilities                 | 2.0                     | 1.3   | 1.1   | 1.0   | 0.6     |
| Variety of work                  | 2.4                     | 2.1   | 1.9   | 1.8   | 1.2     |
| Hours worked                     | 3.7                     | 4.8   | 5.0   | 5.2   | 5.2     |
| Workload                         | 3.6                     | 4.0   | 5.2   | 5.4   | 6.2     |
| Work itself                      | 2.7                     | 2.6   | 3.9   | 3.6   | 3.2     |
| Security of job                  | 3.8                     | 4.0   | 5.2   | 4.1   | 3.2     |
| Total pay                        | 5.2                     | 5.8   | 5.3   | 5.9   | 4.2     |
| Fringe benefits                  | 5.0                     | 5.6   | 4.5   | 5.0   | 3.6     |

**Table S5.** Prioritization of employee motivations based on the size of employing unit (1-7 points scale).

| Motivations                      | Size of Employing Unit* |     |     |     |     |
|----------------------------------|-------------------------|-----|-----|-----|-----|
|                                  | 1                       | 2   | 3   | 4   | 5   |
| Friendliness of co-workers       | 2.5                     | 2.9 | 2.6 | 3.1 | 3.9 |
| Relations with supervisor        | 3.7                     | 3.7 | 4.0 | 5.9 | 4.7 |
| Ability/Efficiency of management | 2.3                     | 2.6 | 2.7 | 3.8 | 3.6 |
| Promotion prospects              | 3.9                     | 4.8 | 3.8 | 3.2 | 2.0 |
| Training provided                | 2.2                     | 2.3 | 2.8 | 3.0 | 1.3 |
| Opportunity to show initiative   | 2.9                     | 3.4 | 3.2 | 2.4 | 1.8 |
| Use of abilities                 | 1.4                     | 1.2 | 1.6 | 1.4 | 0.7 |
| Variety of work                  | 1.7                     | 1.9 | 1.8 | 2.9 | 1.4 |
| Hours worked                     | 3.1                     | 4.3 | 4.8 | 5.9 | 6.0 |
| Workload                         | 5.0                     | 4.6 | 5.2 | 5.6 | 4.3 |
| Work itself                      | 1.9                     | 2.3 | 3.7 | 4.2 | 3.7 |
| Security of job                  | 2.7                     | 3.6 | 4.9 | 5.5 | 3.6 |
| Total pay                        | 4.2                     | 4.8 | 6.0 | 5.8 | 5.6 |
| Fringe benefits                  | 3.5                     | 5.0 | 4.3 | 6.8 | 4.1 |

\*Size of employing unit: 1. turnover less than 100 thousand euros; 2. turnover between 100 and 250 thousand euros; 3. turnover between 250 and 500 thousand euros; 4. turnover between 500 and 750 thousand euros; 5. turnover greater than 1 million euros

### Supplementary Materials. Employee job satisfaction based on characteristics.

**Table S6.** Employee job satisfaction based on development region (1-100-point scale).

| Satisfaction                     | Development Region |      |
|----------------------------------|--------------------|------|
|                                  | NE                 | SE   |
| Friendliness of co-workers       | 32.8               | 32.3 |
| Relations with supervisor        | 39.1               | 34.0 |
| Ability/Efficiency of management | 14.7               | 14.4 |
| Promotion prospects              | 30.7               | 24.4 |
| Training provided                | 17.7               | 16.7 |
| Opportunity to show initiative   | 17.4               | 18.1 |
| Use of abilities                 | 12.3               | 9.4  |
| Variety of work                  | 21.4               | 19.9 |
| Hours worked                     | 38.2               | 34.0 |
| Workload                         | 44.2               | 38.1 |
| Work itself                      | 28.6               | 26.8 |
| Security of job                  | 39.6               | 34.6 |
| Total pay                        | 35.5               | 34.7 |
| Fringe benefits                  | 27.2               | 29.4 |

**Table S7.** Employee job satisfaction based on gender (1-100-point scale).

| Satisfaction                     | Gender |      |
|----------------------------------|--------|------|
|                                  | Women  | Male |
| Friendliness of co-workers       | 41.9   | 24.3 |
| Relations with supervisor        | 42.5   | 29.8 |
| Ability/Efficiency of management | 11.7   | 14.0 |
| Promotion prospects              | 27.1   | 25.8 |
| Training provided                | 19.4   | 20.1 |
| Opportunity to show initiative   | 18.6   | 18.2 |
| Use of abilities                 | 12.7   | 8.9  |
| Variety of work                  | 15.0   | 14.9 |
| Hours worked                     | 42.7   | 29.4 |
| Workload                         | 30.4   | 38.1 |
| Work itself                      | 27.5   | 29.1 |
| Security of job                  | 35.0   | 45.1 |
| Total pay                        | 34.9   | 33.4 |
| Fringe benefits                  | 29.2   | 27.5 |

**Table S8.** Employee job satisfaction based on qualification level (1-100-point scale).

| Satisfaction                     | Qualification level |                     |                  |
|----------------------------------|---------------------|---------------------|------------------|
|                                  | Unqualified         | Average Unqualified | Highly Qualified |
| Friendliness of co-workers       | 38.6                | 26.1                | 32.9             |
| Relations with supervisor        | 37.6                | 37.5                | 34.6             |
| Ability/Efficiency of management | 4.7                 | 14.8                | 24.1             |
| Promotion prospects              | 10.5                | 36.4                | 35.8             |
| Training provided                | 11.1                | 13.7                | 26.9             |
| Opportunity to show initiative   | 16.4                | 15.7                | 21.1             |
| Use of abilities                 | 5.8                 | 13.9                | 12.8             |
| Variety of work                  | 10.1                | 21.9                | 30.0             |
| Hours worked                     | 48.7                | 40.4                | 19.2             |
| Workload                         | 43.3                | 44.5                | 35.7             |
| Work itself                      | 36.6                | 28.4                | 18.1             |
| Security of job                  | 35.3                | 40.6                | 35.5             |
| Total pay                        | 42.1                | 37.5                | 25.7             |
| Fringe benefits                  | 33.3                | 25.7                | 26.0             |

**Table S9.** Employee job satisfaction based on job experience (1-100-point scale).

| <b>Satisfaction</b>              | <b>Work Experience (years)</b> |              |              |              |                |
|----------------------------------|--------------------------------|--------------|--------------|--------------|----------------|
|                                  | <b>0-10</b>                    | <b>10-20</b> | <b>20-30</b> | <b>30-40</b> | <b>over 40</b> |
| Friendliness of co-workers       | 32.1                           | 32.6         | 29.9         | 28.7         | 42.7           |
| Relations with supervisor        | 36.1                           | 31.3         | 32.8         | 37.0         | 45.0           |
| Ability/Efficiency of management | 10.7                           | 13.1         | 12.6         | 13.3         | 14.2           |
| Promotion prospects              | 15.0                           | 27.0         | 24.6         | 20.2         | 21.8           |
| Training provided                | 22.0                           | 18.3         | 17.9         | 19.9         | 14.3           |
| Opportunity to show initiative   | 22.7                           | 23.8         | 17.1         | 13.6         | 15.1           |
| Use of abilities                 | 13.8                           | 9.7          | 9.8          | 10.0         | 7.8            |
| Variety of work                  | 21.1                           | 20.1         | 19.9         | 20.4         | 16.8           |
| Hours worked                     | 31.1                           | 35.7         | 36.9         | 35.8         | 36.4           |
| Workload                         | 37.2                           | 39.1         | 40.6         | 41.9         | 44.9           |
| Work itself                      | 19.6                           | 19.3         | 24.8         | 41.1         | 41.7           |
| Security of job                  | 37.8                           | 39.1         | 40.6         | 43.3         | 36.7           |
| Total pay                        | 33.0                           | 30.6         | 35.1         | 36.9         | 32.3           |
| Fringe benefits                  | 19.1                           | 30.7         | 26.7         | 32.4         | 32.6           |

**Table S10.** Employee job satisfaction based on employer company size (1-100-point scale).

| <b>Motivations</b>               | <b>Size of Employing Unit*</b> |          |          |          |          |
|----------------------------------|--------------------------------|----------|----------|----------|----------|
|                                  | <b>1</b>                       | <b>2</b> | <b>3</b> | <b>4</b> | <b>5</b> |
| Friendliness of co-workers       | 78.0                           | 92.9     | 91.7     | 91.5     | 100.0    |
| Relations with supervisor        | 50.4                           | 69.8     | 60.2     | 77.7     | 88.5     |
| Ability/Efficiency of management | 23.8                           | 41.1     | 34.8     | 43.8     | 36.5     |
| Promotion prospects              | 19.6                           | 46.4     | 63.3     | 85.6     | 97.0     |
| Training provided                | 50.4                           | 55.6     | 55.0     | 83.7     | 103.8    |
| Opportunity to show initiative   | 40.6                           | 43.7     | 50.7     | 69.7     | 75.0     |
| Use of abilities                 | 50.4                           | 49.6     | 66.5     | 91.7     | 103.8    |
| Variety of work                  | 84.0                           | 91.3     | 91.7     | 97.4     | 111.5    |
| Hours worked                     | 61.6                           | 67.9     | 65.0     | 63.8     | 55.8     |
| Workload                         | 75.6                           | 89.3     | 73.3     | 71.7     | 57.7     |
| Work itself                      | 53.2                           | 67.9     | 49.1     | 91.5     | 103.8    |
| Security of job                  | 72.8                           | 89.3     | 60.2     | 93.0     | 92.3     |
| Total pay                        | 46.5                           | 47.8     | 51.3     | 57.8     | 61.5     |
| Fringe benefits                  | 28.0                           | 50.0     | 45.9     | 59.8     | 66.9     |

\*Size of employing unit: 1. turnover less than 100 thousand euros; 2. turnover between 100 and 250 thousand euros; 3. turnover between 250 and 500 thousand euros; 4. turnover between 500 and 750 thousand euros; 5. turnover greater than 1 million euros.

**Supplementary Materials. Average labour expenditure.**

**Table S11.** Average labour expenditure (euro/person/year).

| Years of<br>Experience/Qualification<br>Development region | Unqualified |           | Average Unqualified |           | Highly Qualified |           |
|------------------------------------------------------------|-------------|-----------|---------------------|-----------|------------------|-----------|
|                                                            | NE region   | SE region | NE region           | SE region | NE region        | SE region |
| 0-10                                                       | 8,214       | 8,617     | 18,732              | 20,183    | 30,015           | 40,072    |
| 10-20                                                      | 8,243       | 8,767     | 24,555              | 25,816    | 35,965           | 53,228    |
| 20-30                                                      | 9,067       | 9,804     | 26,698              | 29,313    | 38,978           | 58,401    |
| 30-40                                                      | 9,973       | 10,881    | 29,013              | 31,548    | 41,040           | 61,540    |
| > 40                                                       | 10,971      | 11,583    | 31,841              | 34,572    | 41,668           | 62,329    |
